# Supplementary material for: A prosurvival DNA damage-induced cytoplasmic interferon response is mediated by end resection factors and is limited by Trex1
Source: PubMed Central journal article supplement (PMC5358756; doi:10.1101/gad.289769.116), 2017-02-15

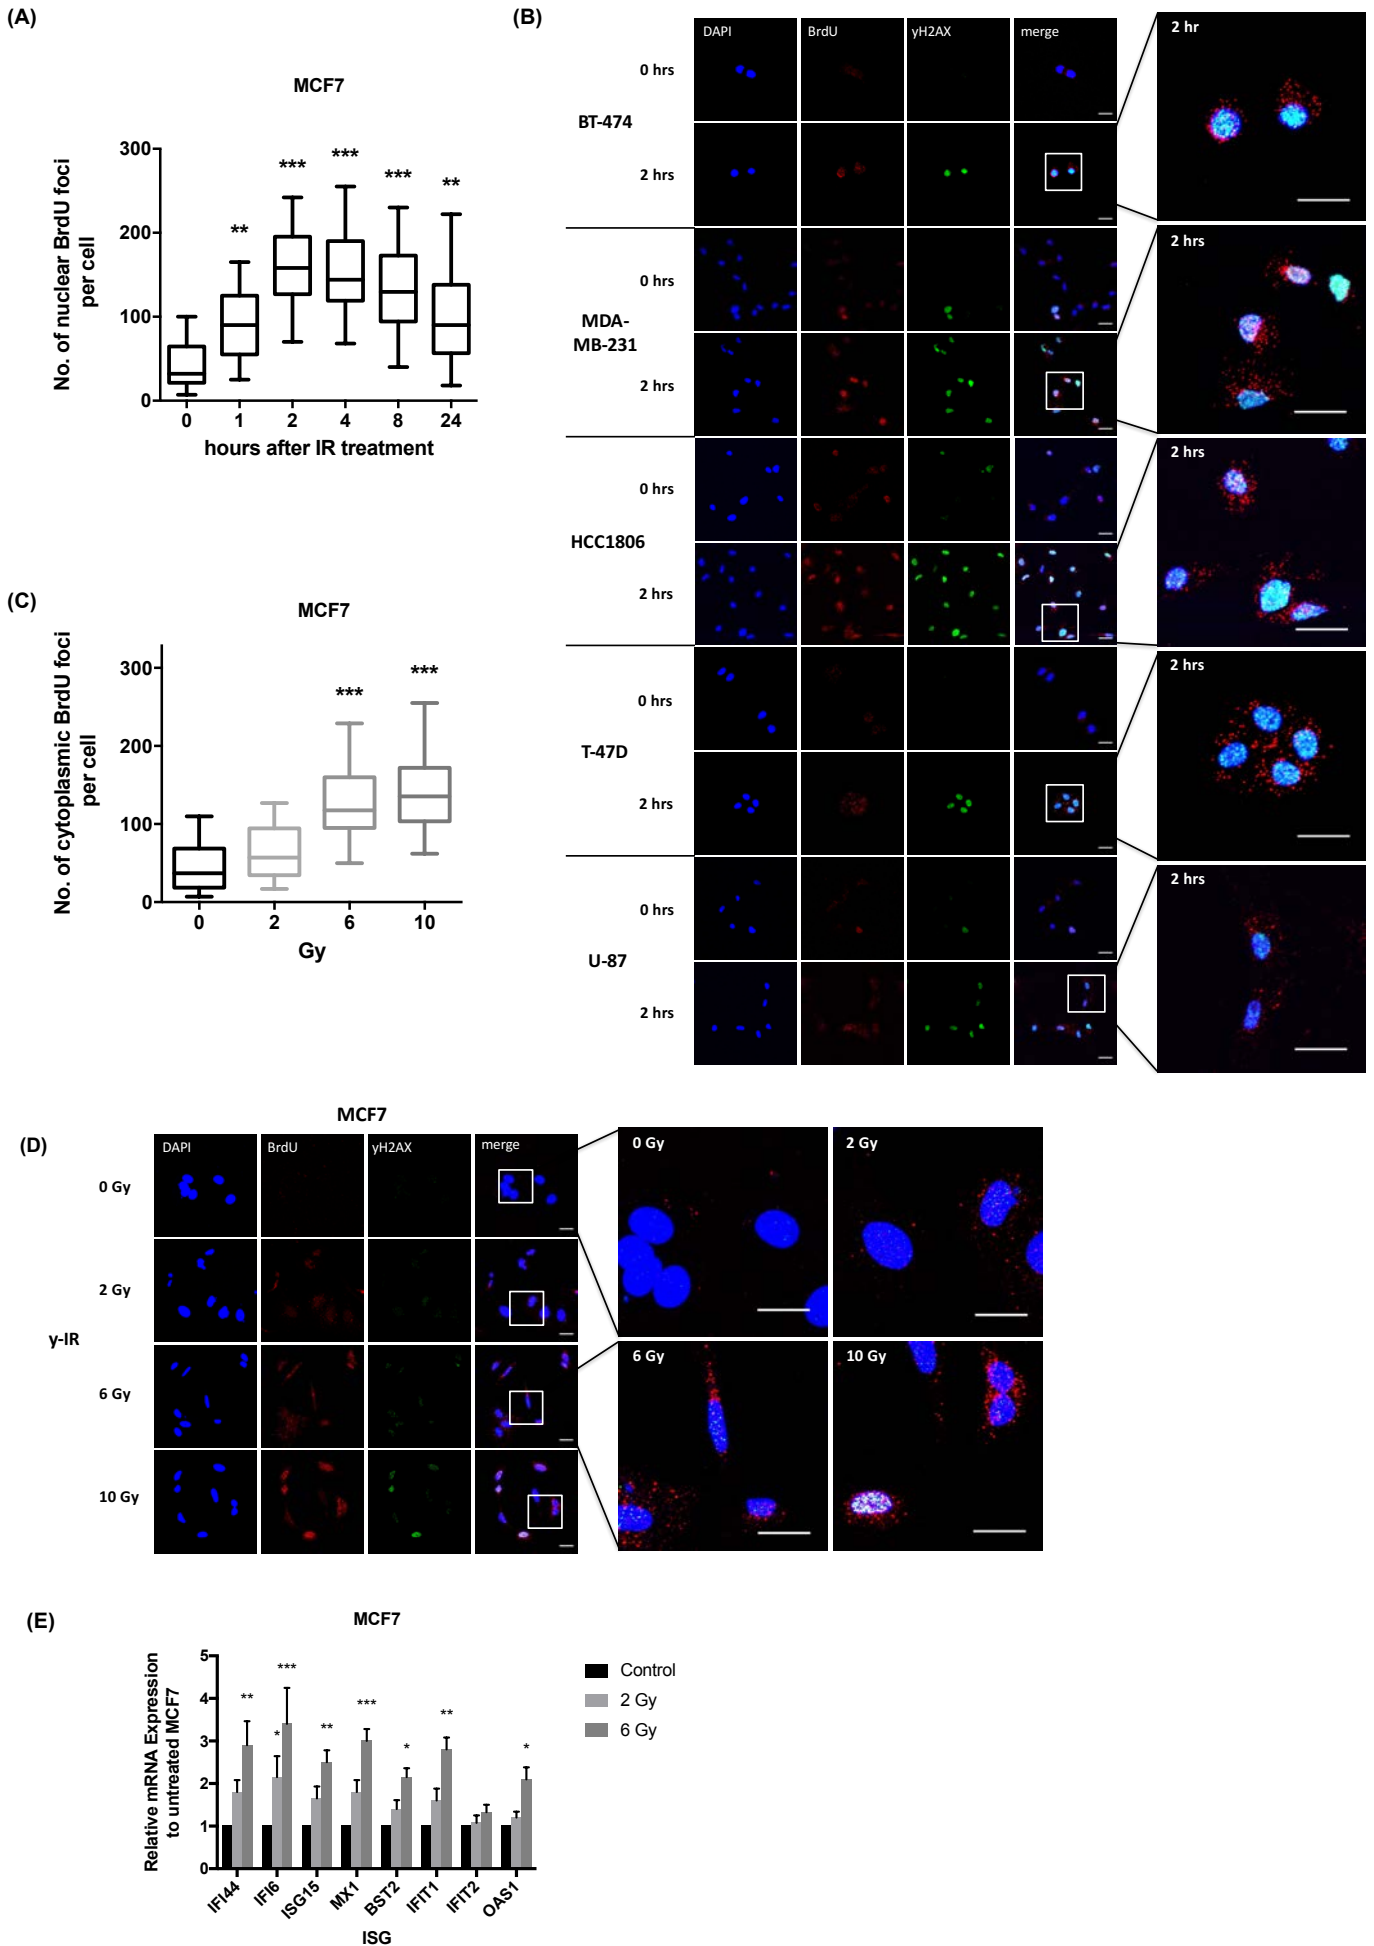

(A)

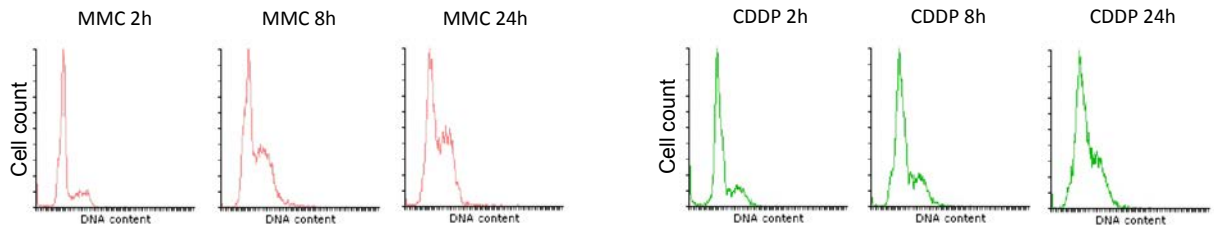

(B)

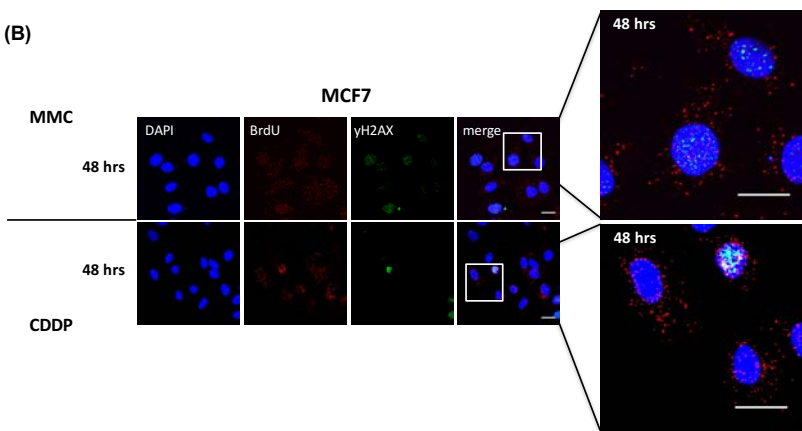

(C)

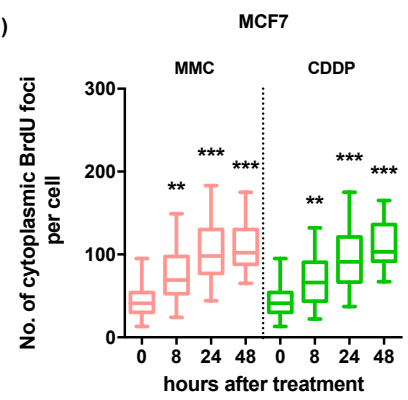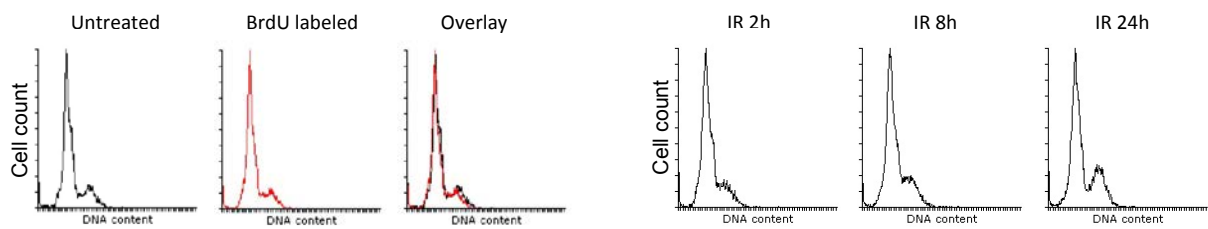

Erdal\_Supplementary Fig. 4

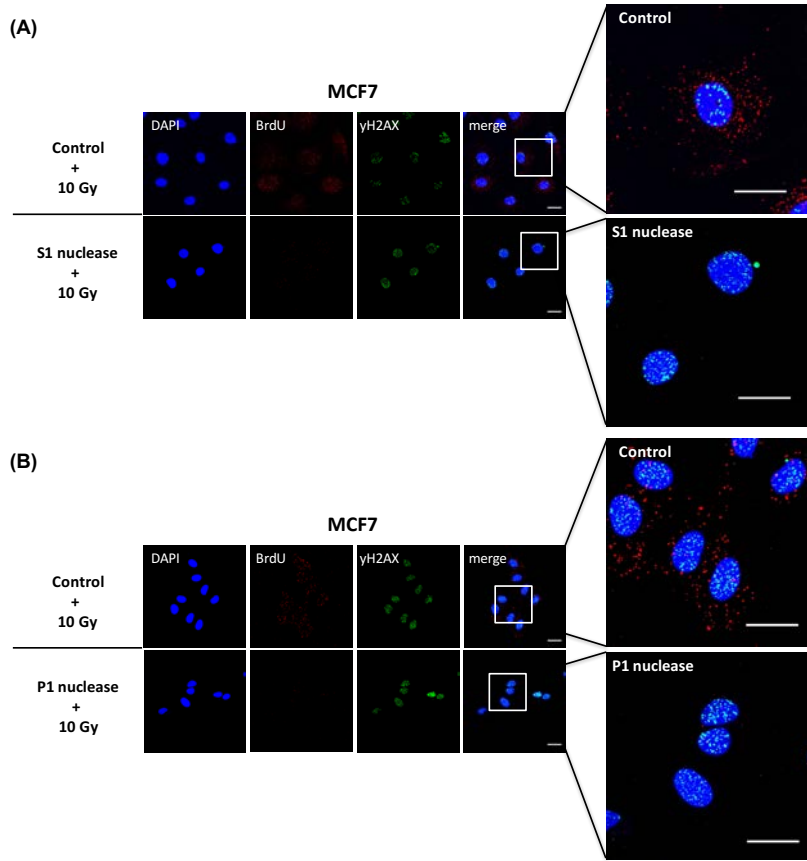

Erdal\_Supplementary Fig. 5

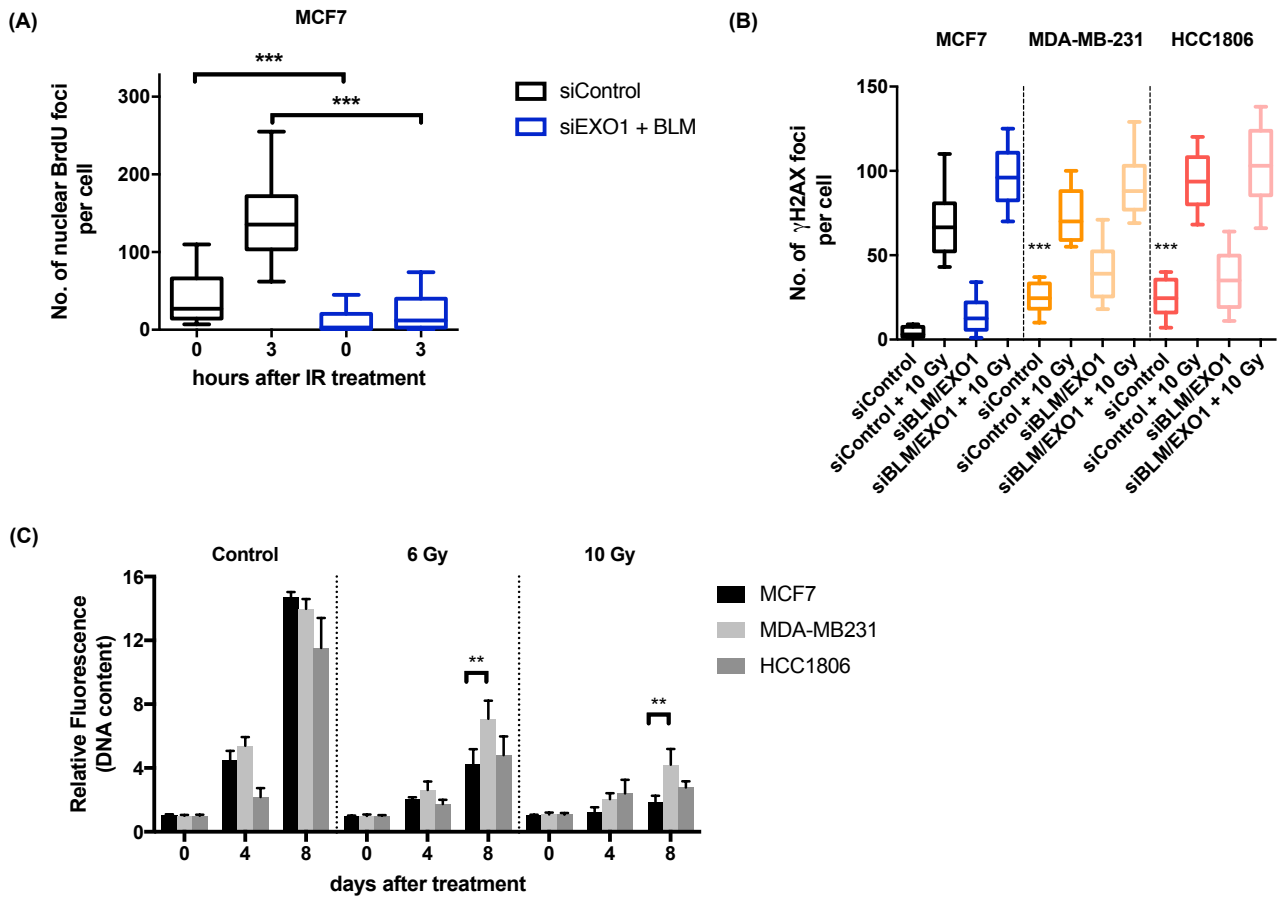

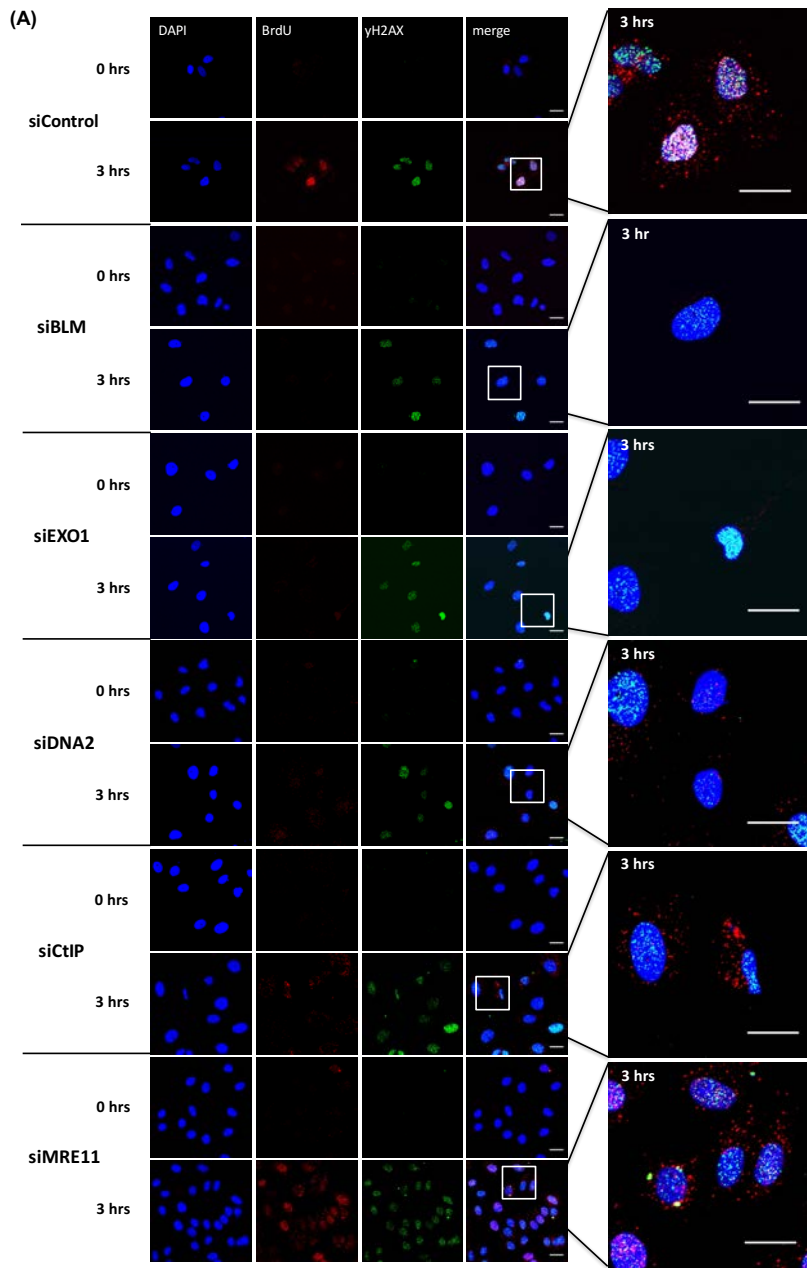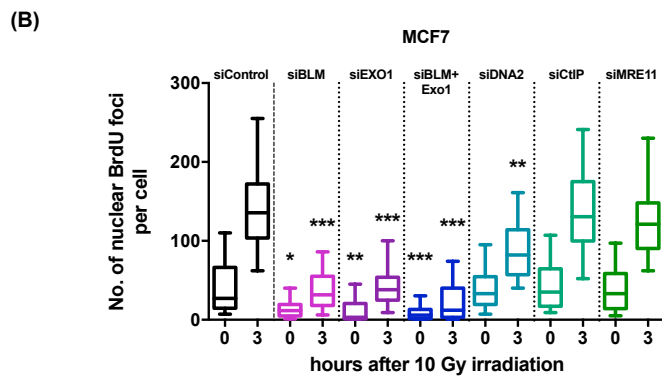

(A)

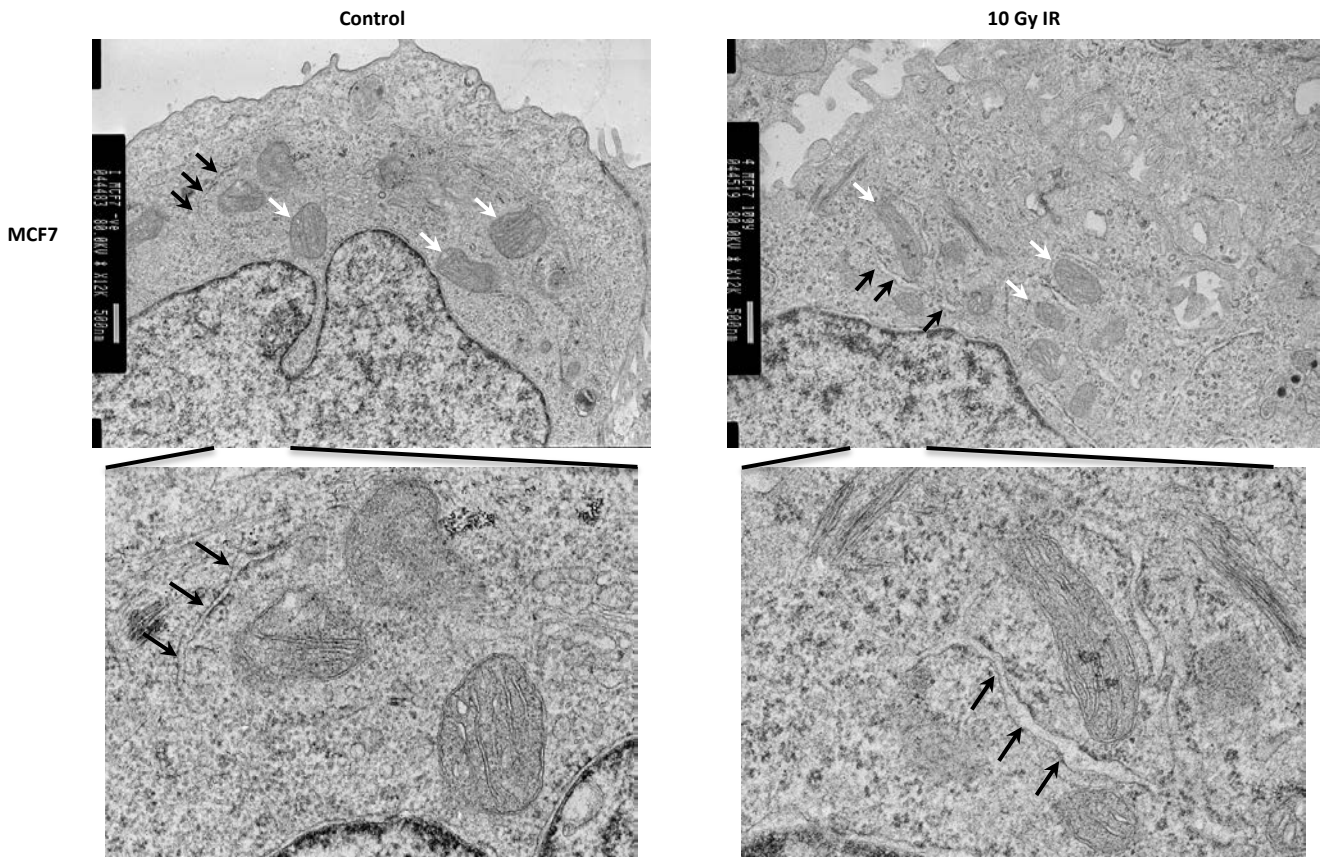

(B)

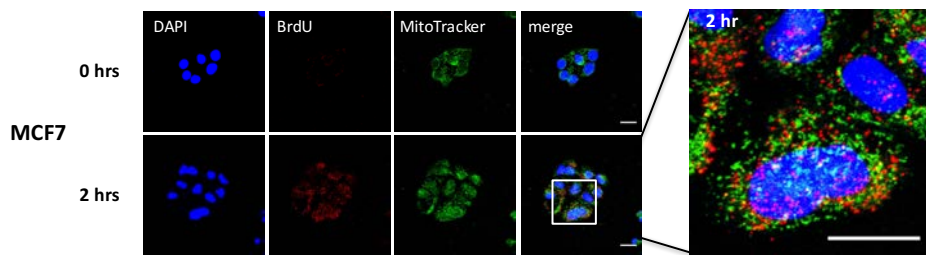

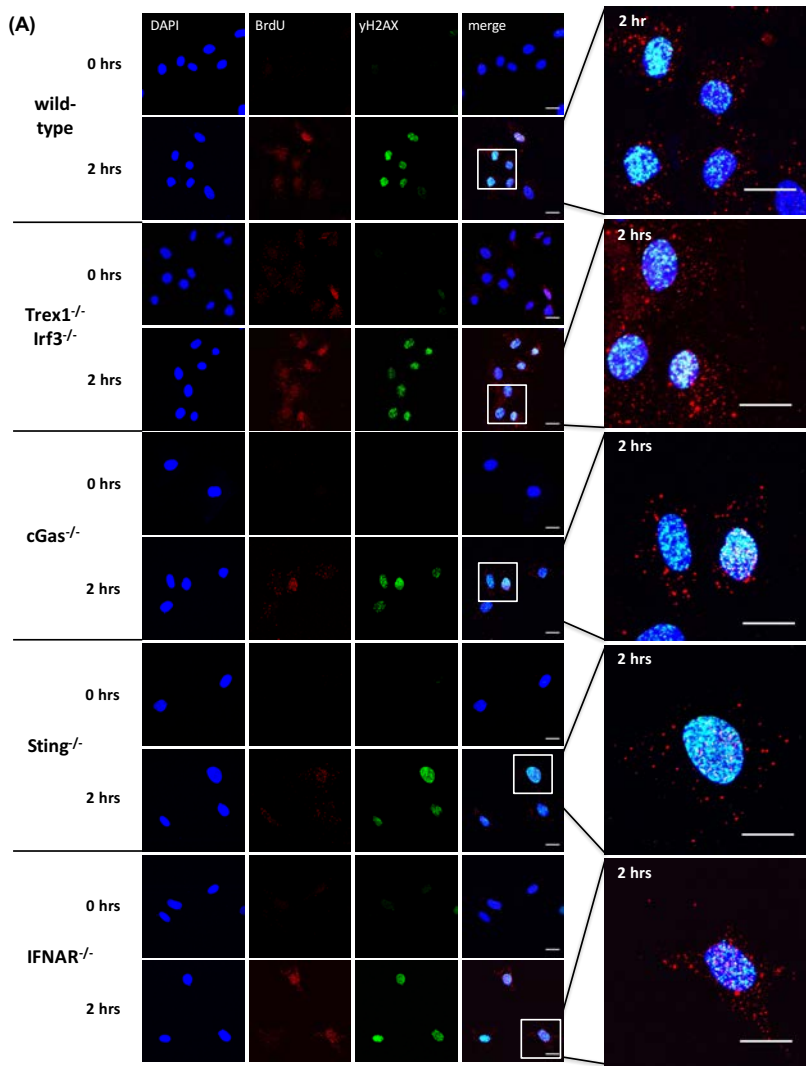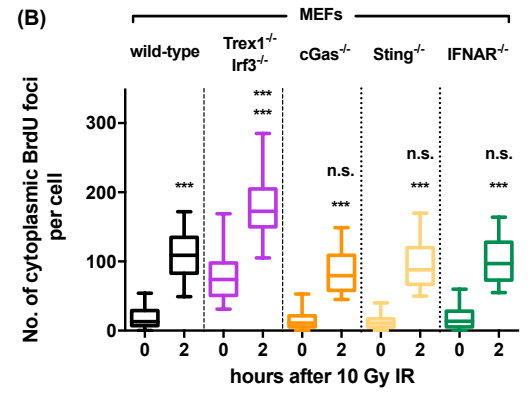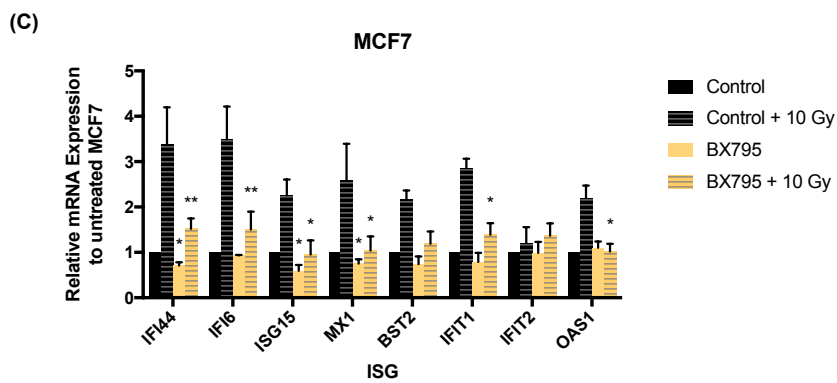



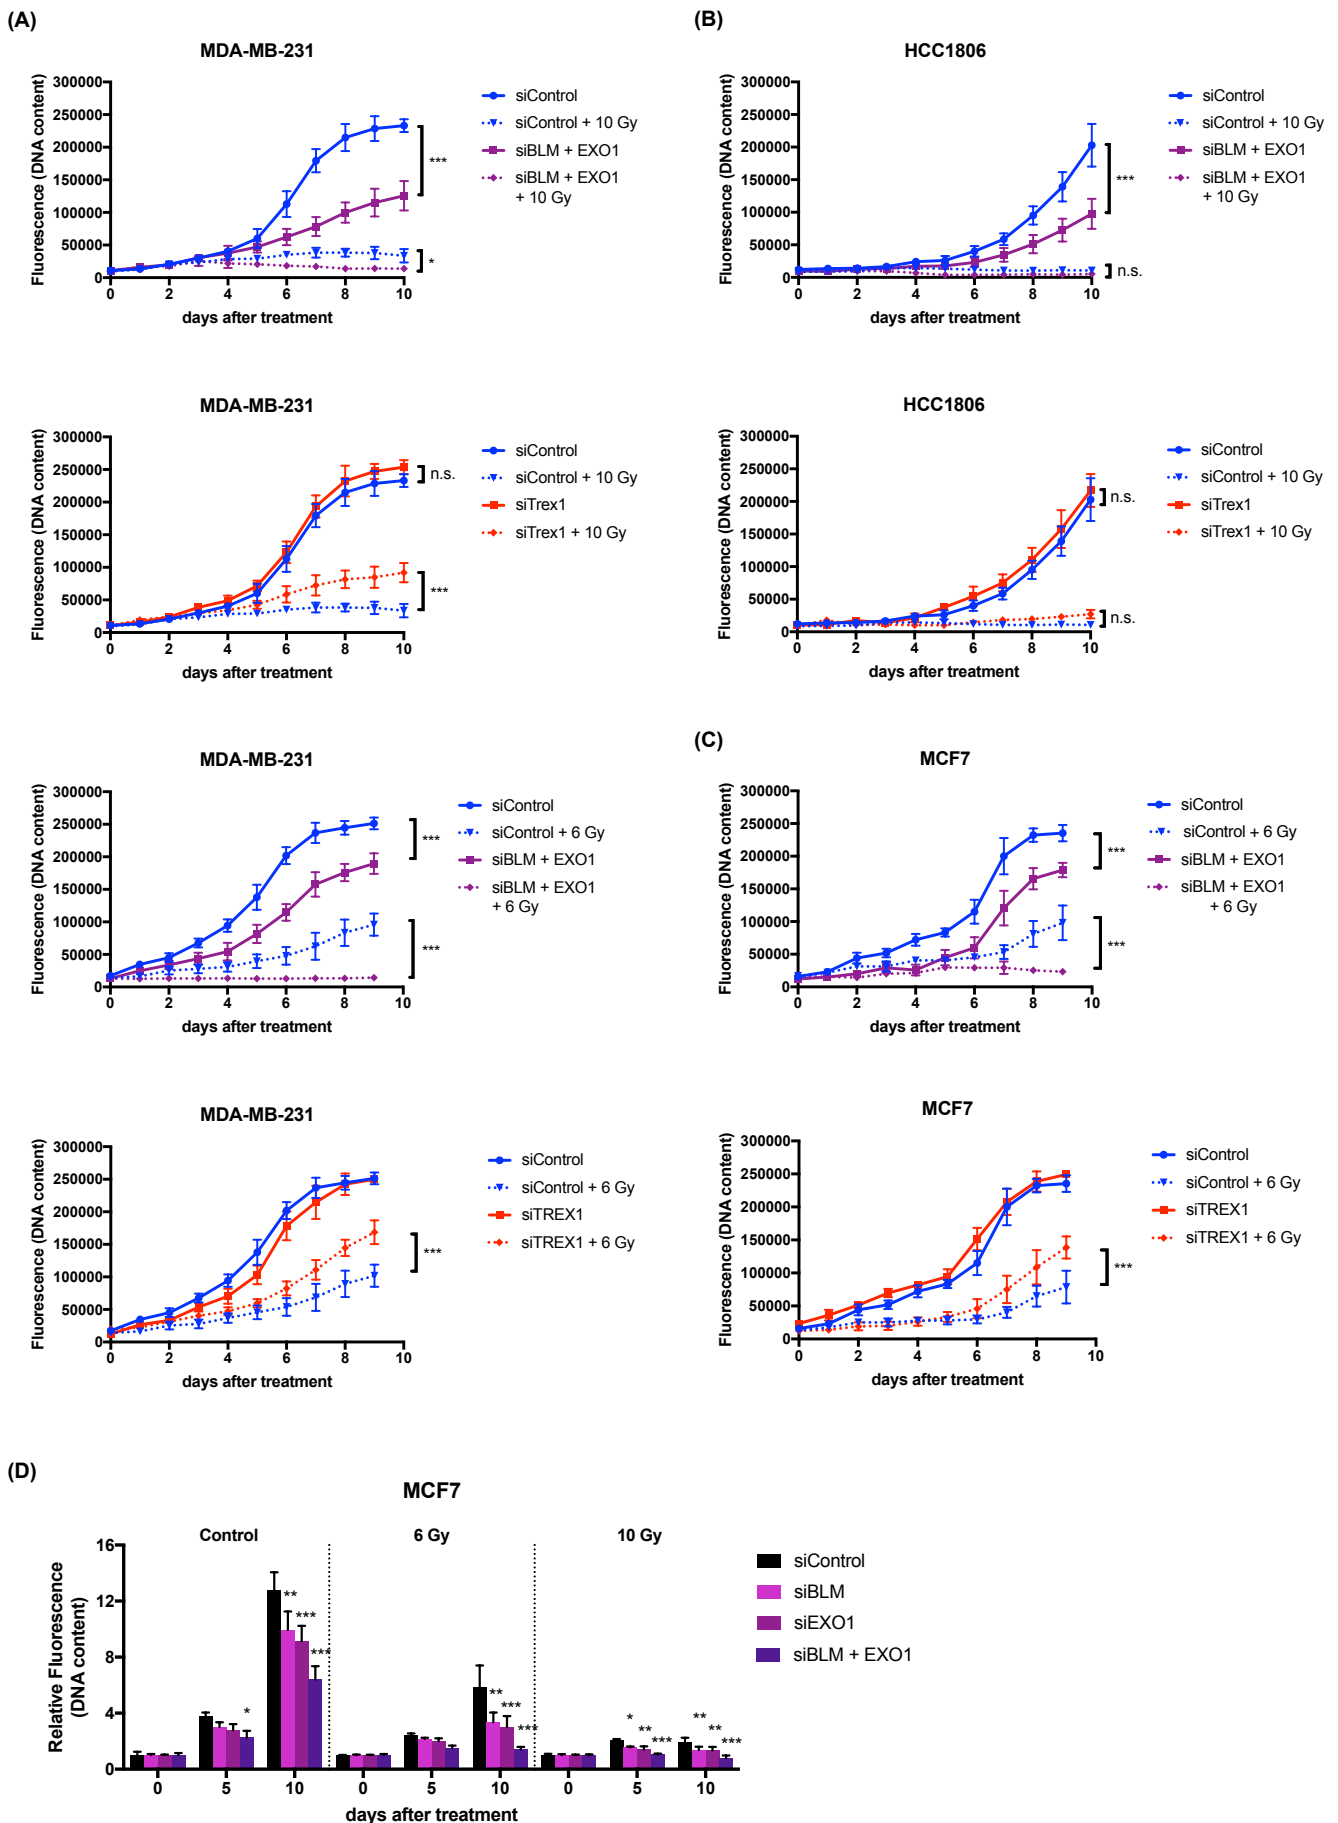

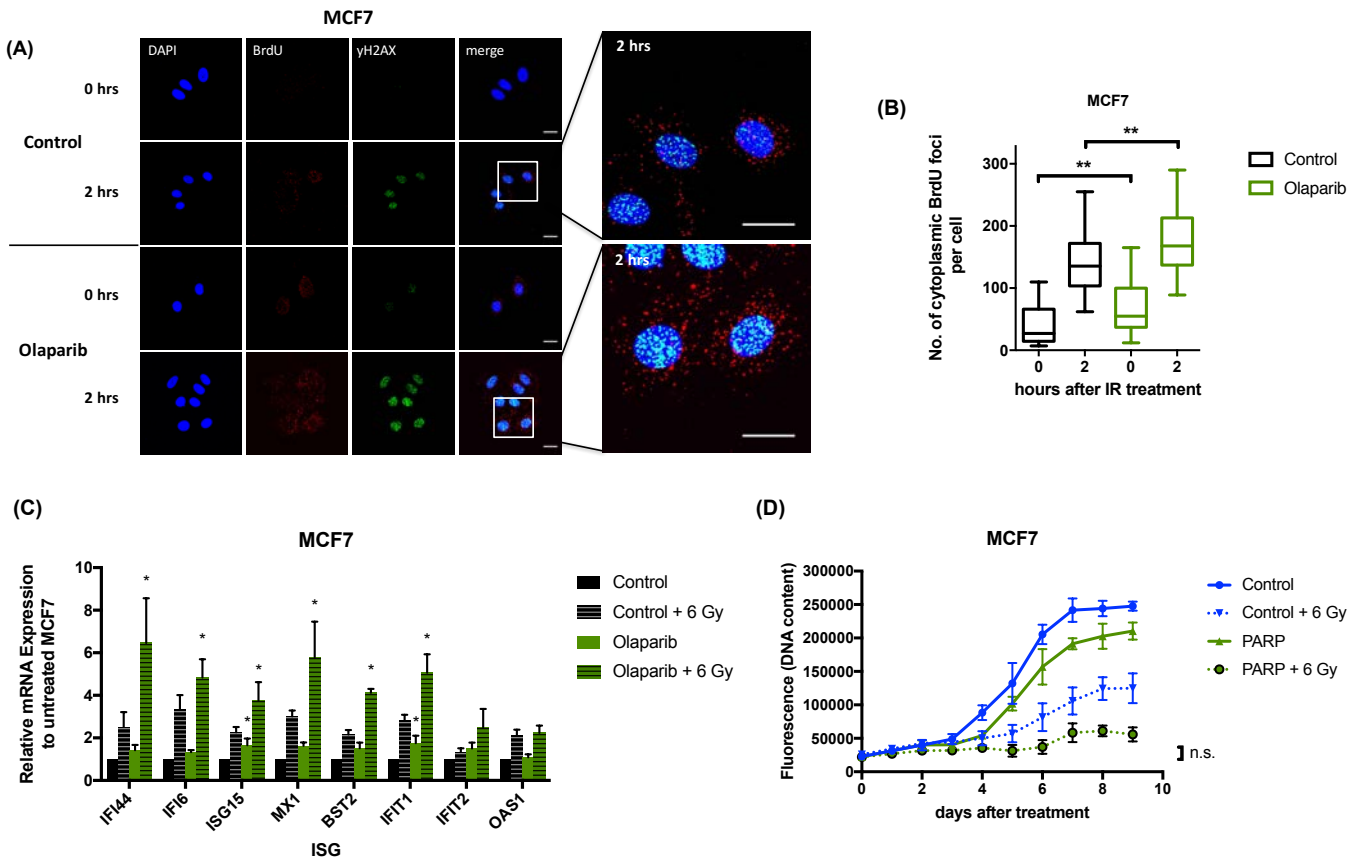

Supplement: supp_gad.289769.116_Supplementary_Figs.pdf [file supp_gad.289769.116_Supplementary_Figs.pdf]
