# Supplementary material for: A prosurvival DNA damage-induced cytoplasmic interferon response is mediated by end resection factors and is limited by Trex1
Source: PubMed Central journal article supplement (PMC5358756; doi:10.1101/gad.289769.116), 2017-02-15
Supplement: supp_gad.289769.116_SupplementaryTableErdal.pdf [file supp_gad.289769.116_SupplementaryTableErdal.pdf]

**Supplementary Table 1: Statistical analysis of mRNA abundance box plots**

| Subtypes                                         | TREX1     |             | BLM       |             | EXO1      |             | DNA2      |             |
|--------------------------------------------------|-----------|-------------|-----------|-------------|-----------|-------------|-----------|-------------|
|                                                  | FC        | P           | FC        | P           | FC        | P           | FC        | P           |
| Tumour (grey) vs Normal (white)                  | 0.647     | 3.04E-68    | 0.617     | 6.67E-94    | 1.226     | 6.84E-117   | 0.147     | 2.28E-12    |
| <b>PAM50 Subtypes (green) and Normal (white)</b> | <b>FC</b> | <b>adjP</b> | <b>FC</b> | <b>adjP</b> | <b>FC</b> | <b>adjP</b> | <b>FC</b> | <b>adjP</b> |
| Normal vs Normal-like                            | 0.514     | 6.47E-11    | 0.330     | 6.47E-11    | 0.592     | 6.47E-11    | 0.029     | 0.891       |
| Normal vs LuminalA                               | -0.811    | 6.46E-11    | -0.322    | 6.47E-11    | -0.746    | 6.46E-11    | -0.081    | 0.005       |
| Normal vs LuminalB                               | -0.769    | 6.46E-11    | -0.688    | 6.46E-11    | -1.445    | 6.46E-11    | -0.161    | 3.02E-10    |
| Normal vs Her2                                   | -0.539    | 6.47E-11    | -0.884    | 6.46E-11    | -1.653    | 6.46E-11    | -0.288    | 6.47E-11    |
| Normal vs Basal                                  | -0.263    | 1.18E-06    | -1.139    | 6.46E-11    | -2.031    | 6.46E-11    | -0.241    | 6.47E-11    |
| Normal-like vs LuminalA                          | -0.297    | 6.52E-11    | 0.008     | n.s         | -0.154    | 4.13E-03    | -0.052    | 0.099       |
| Normal-like vs LuminalB                          | -0.254    | 9.02E-09    | -0.358    | 6.46E-11    | -0.854    | 6.46E-11    | -0.131    | 6.14E-09    |
| Normal-like vs Her2                              | -0.025    | n.s         | -0.554    | 6.46E-11    | -1.061    | 6.46E-11    | -0.258    | 6.47E-11    |
| Normal-like vs Basal                             | 0.251     | 1.62E-07    | -0.809    | 6.46E-11    | -1.440    | 6.46E-11    | -0.212    | 6.47E-11    |
| LuminalA vs LuminalB                             | -0.043    | n.s         | 0.367     | 6.46E-11    | 0.699     | 6.46E-11    | 0.080     | 8.44E-07    |
| LuminalA vs Her2                                 | 0.272     | 6.66E-11    | -0.562    | 6.46E-11    | -0.907    | 6.46E-11    | -0.207    | 6.46E-11    |
| LuminalA vs Basal                                | 0.548     | 6.46E-11    | -0.817    | 6.46E-11    | -1.285    | 6.46E-11    | -0.160    | 6.47E-11    |
| LuminalB vs Her2                                 | 0.230     | 4.57E-08    | -0.195    | 1.58E-10    | -0.207    | 1.50E-05    | -0.127    | 2.28E-09    |
| LuminalB vs Basal                                | 0.505     | 6.46E-11    | -0.450    | 6.46E-11    | -0.586    | 6.46E-11    | -0.081    | 8.77E-05    |
| Her2 vs Basal                                    | 0.276     | 7.00E-10    | -0.255    | 6.47E-11    | -0.379    | 6.47E-11    | 0.046     | 0.24        |

FC = log2 Fold change  
P = P value  
adjP = Adjust P value  
Note: All pairwise comparisons were performed using TUKEY HSD test.

**Supplementary Table 2: List of primary antibodies**

| Protein       | Catalog No. | Clone        | Manufacturer            | Application        | Dilution |
|---------------|-------------|--------------|-------------------------|--------------------|----------|
| STAT1         | #9175       | 42H3         | Cell Signaling          | Western blot       | 1:1000   |
| pSTAT1 (Y701) | #7649       | D4A7         | Cell Signaling          | Western blot       | 1:1000   |
| pSTAT1 (S727) | #9177       | N/A          | Cell Signaling          | Western blot       | 1:1000   |
| β-Actin       | A3854       | AC-15        | Sigma-Aldrich           | Western blot       | 1:10000  |
| pChk2 (T68)   | #2661       | N/A          | Cell Signaling          | Western blot       | 1:1000   |
| BLM           | A300-110A   | N/A          | Bethyl Lab.             | Western blot       | 1:2000   |
| EXO1          | Sc199941    | N-18         | Santa Cruz              | Western blot       | 1:500    |
| Trex1         | Ab185228    | EPR14<br>985 | Abcam                   | Western blot       | 1:1000   |
| ISG15         | N/A         | N/A          | Gift of A.<br>Pichlmair | Western blot       | 1:2000   |
| γH2AX (S139)  | #9718       | 20E3         | Cell Signaling          | Immunofluorescence | 1:400    |
| BrdU          | RPN202      | BU-1         | GE Healthcare           | Immunofluorescence | 1:250    |

**Supplementary Table 3: List of siRNA target sequences**

| Gene          | Target Sequence 5' → 3' | Source                  |
|---------------|-------------------------|-------------------------|
| BLM           | GCTAGGAGTCTGCGTGCATT    | Invitrogen              |
| EXO1          | CAGATGTAGCACGTAATTCAA   | Qiagen                  |
| DNA2 Pool #1  | TGGCGCTGGAACCTTGTCT     | Invitrogen              |
| #2            | TTTCGGTACACCTGTGCTT     | Invitrogen              |
| #3            | AAGCACAGGTGTACCGAAA     | Invitrogen              |
| #4            | AGACAAGGTTCCAGCGCCA     | Invitrogen              |
| CtIP Pool #1  | GGAGCTACCTCTAGTATCA     | Eurofins                |
| #2            | GAGGTTATATTAAGGAAGA     | Eurofins                |
| #3            | GAACAGAATAGGACTGAGT     | Eurofins                |
| #4            | GCACGTTGCCCAAAGATTC     | Eurofins                |
| MRE11 Pool #1 | GGAGGTACGTCGTTTCAGA     | Eurofins                |
| #2            | GGAAATGATACGTTTGTA      | Eurofins                |
| #3            | CGAAATGTCACTACTAAGA     | Eurofins                |
| #4            | GAAAGGCTCTATCGAATGT     | Eurofins                |
| TREX1 Pool #1 | CCAAGACCATCTGCTGTCA     | Dharmacon ON-TARGETplus |
| #2            | ACAATGGTGACCGCTACGA     | Dharmacon ON-TARGETplus |

**Supplementary Table 4: List of Primers for rt-qPCR**

| <b>Human Primers</b> |                               |                               |
|----------------------|-------------------------------|-------------------------------|
| <b>Gene</b>          | <b>Forward Primer 5' → 3'</b> | <b>Reverse Primer 5' → 3'</b> |
| IFI44                | ATGGCAGTGACAACCTCGTTTG        | TCCTGGTAACTCTCTTCTGCATA       |
| IFI6                 | TCGCTGATGAGCTGGTCTGC          | ATTACCTATGACGACGCTGC          |
| ISG15                | GCGAACTCATCTTTGCCAGTA         | CCAGCATCTTCACCGTCAG           |
| MX1                  | TTCAGCACCTGATGGCCTA           | AAAGGGATGTGGCTGGAGAT          |
| BST2                 | CCGTCCTGCTCGGCTTT             | CCGCTCAGAACTGATGAGATCA        |
| IFIT1                | TACCTGGACAAGGTGGAGAA          | GTGAGGACATGTTGGCTAGA          |
| IFIT2                | TGTGCAACCTACTGGCCTAT          | TTGCCAGTCCAGAGGTGAAT          |
| OAS1                 | CGCCTAGTCAAGCACTGGTA          | CAGGAGCTCCAGGGCATA            |
| DNA2                 | GGTGCCATACCTGTCAAAAT          | AGGACCGACAAGTTTCTGTCTA        |
| CtIP                 | AGATCGGTTAAGAGCAGGCTT         | GATTCTGCTGCCGGATATTT          |
| β-actin              | TGTCCACCTTCCAGCAGATGT         | CACCTTCACCGTTCCAGTTTT         |
| GAPDH                | GACCCCTTCATTGACCTCAAC         | CTTCTCCATGGTGGTGAAGA          |
| <b>Mouse Primers</b> |                               |                               |
| <b>Gene</b>          | <b>Forward Primer 5' → 3'</b> | <b>Reverse Primer 5' → 3'</b> |
| IFI44                | AACTGACTGCTCGCAATAATGT        | GTAACACAGCAATGCCTCTTGT        |
| ISG15                | GGTGTCCGTGACTAACTCCAT         | TGGAAAGGGTAAGACCGTCCT         |
| MX1                  | GACCATAGGGGTCTTGACCAA         | AGACTTGCTCTTTCTGAAAAGCC       |
| BST2                 | TGTTCCGGGTTACCTTAGTCA         | GCAGGAGTTTGCCTGTGTCT          |
| IFIT1                | CCAAGTGTCCAATGCTCCT           | GGATGGAATTGCCTGCTAGA          |
| IFIT2                | AGTACAACGAGTAAGGAGTCACT       | AGGCCAGTATGTTGCACATGG         |
| β-actin              | TGTCCACCTTCCAGCAGATGT         | CGCCTTCACCGTTCCAGTTTT         |
| GAPDH                | GACCCCTTCATTGACCTCAAC         | CTTCTCCATGGTGGTGAAGA          |

**Supplementary Table 5: Cell line specific duration of BrdU treatment**

| <b>Cell line</b> | <b>Hours of BrdU treatment</b> |
|------------------|--------------------------------|
| MCF7             | 38                             |
| BT474            | 48                             |
| MDA-MB-231       | 38                             |
| HCC 1806         | 44                             |
| T-47D            | 40                             |
| U-87             | 38                             |
| MEFs (all)       | 32                             |
